# Supplementary material for: Augmenting the performance of thermally deoxygenated graphite oxide supercapacitor electrodes using 6 M KOH electrolyte with K3Fe(CN)6 redox additive
Source: Royal Society of Chemistry journal article supplement (doi:10.1039/d3ma01188g), 2024-01-01
Supplement: d3ma01188g1.pdf [file d3ma01188g1.pdf]

## Supplementary material

### **Augmenting the performance of thermally deoxygenated graphite oxide supercapacitor electrodes using 6 M KOH electrolyte with $K_3 Fe(CN)_6$ redox additive.**

Arsha M.S. and Biju V.\*

Department of Physics, University of Kerala, Karyavattom, Thiruvananthapuram, Kerala,  
INDIA, Pin- 695581

E-mail:- [bijunano@gmail.com](mailto:bijunano@gmail.com)

#### **Synthesis of graphite oxide (GO)**

The process involved mixing 3g of graphite powder with 70 ml of concentrated sulfuric acid ( $H_2SO_4$ ) while stirring and keeping the temperature below  $10^\circ C$  using an ice bath. Then, 9 g of potassium permanganate ( $KMnO_4$ ) was gradually added to the mixture while keeping the temperature below  $20^\circ C$ . The mixture was then stirred for 30 minutes in an oil bath maintained at  $40^\circ C$ . After this, distilled water was added, and the solution was stirred at  $95^\circ C$  for 15 minutes. To stop the reaction, hydrogen peroxide ( $H_2O_2$ ) was added, causing the colour of the solution to change from dark brown to yellow. The resulting solution was left to settle overnight, and the product obtained was vacuum dried at  $60^\circ C$  to obtain GO.

#### **Thermogravimetric analysis of GO**

Fig. S1 depicts the TGA curve of graphene oxide (GO) under a nitrogen ( $N_2$ ) atmosphere up to  $800^\circ C$ . The TGA curve reveals three distinct stages: initially, around 10% weight loss is evident, attributed to the removal of water molecules. Subsequently, a sharp 25% decrease in weight percentage occurs, associated with the elimination of oxygen functional groups, such as hydroxyl (O-H) and carboxyl (-COOH) groups<sup>1</sup>. Beyond  $275^\circ C$ , a slow decrease in weight loss is observed. This is primarily related to the elimination of remaining functional groups like

carbonyl (-C=O) and epoxy (C-O-C) groups, possessing high binding energy <sup>2</sup>. Beyond 500 °C, ~ 50% weight loss is observed. It is noteworthy that thermally deoxygenated GO beyond 500 °C Celsius may not be beneficial for electrode material purposes. Therefore, deoxygenation temperatures were selected at 100, 200, 300, and 400 degrees.

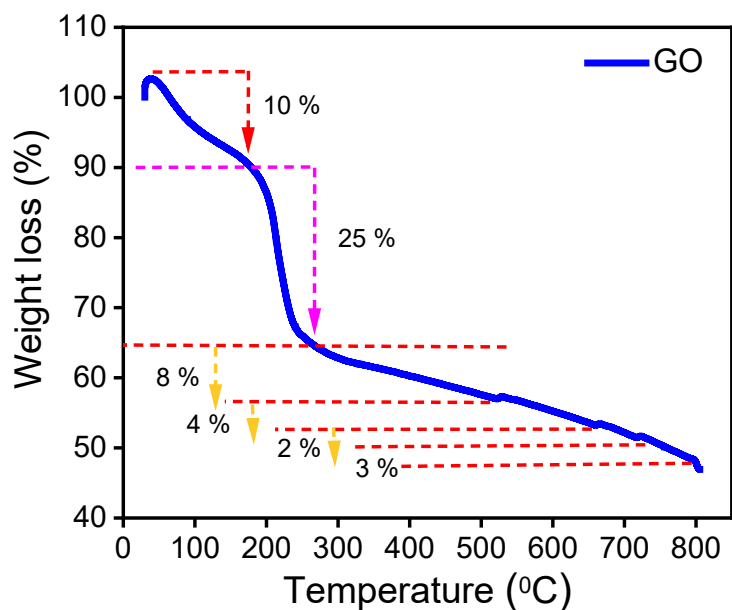

Fig. S1 TGA curve of graphite oxide (GO)

(a)

(b)

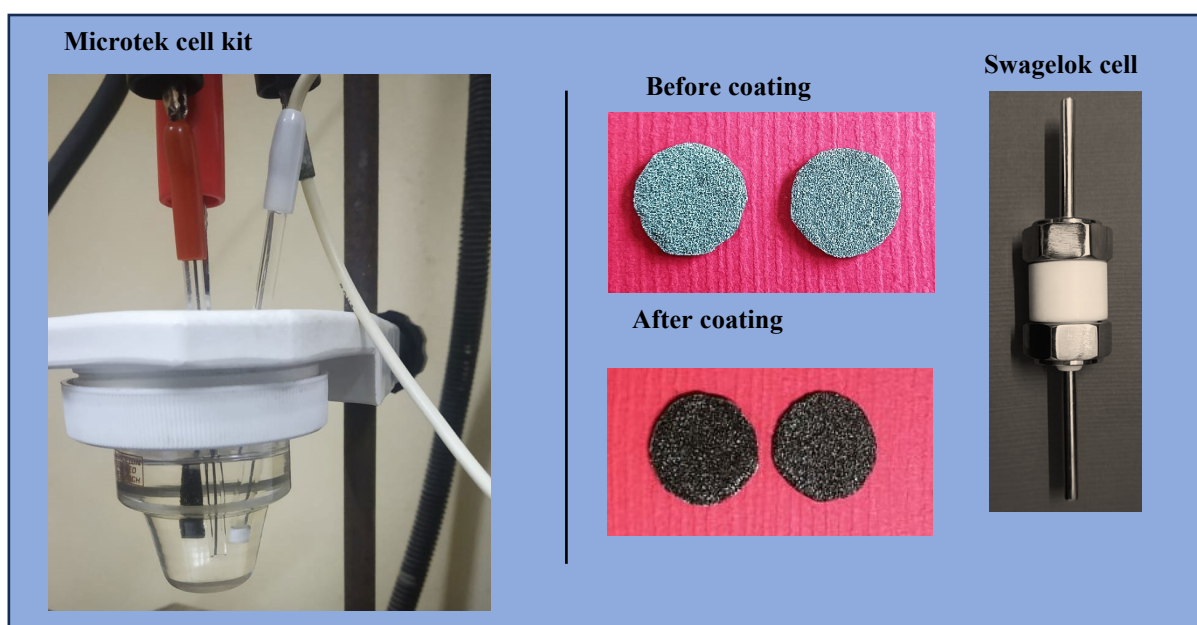

Fig. S2 (a) Microtek cell kit used for three electrode measurement, (b) Swagelok cell assembly used for two electrode configuration

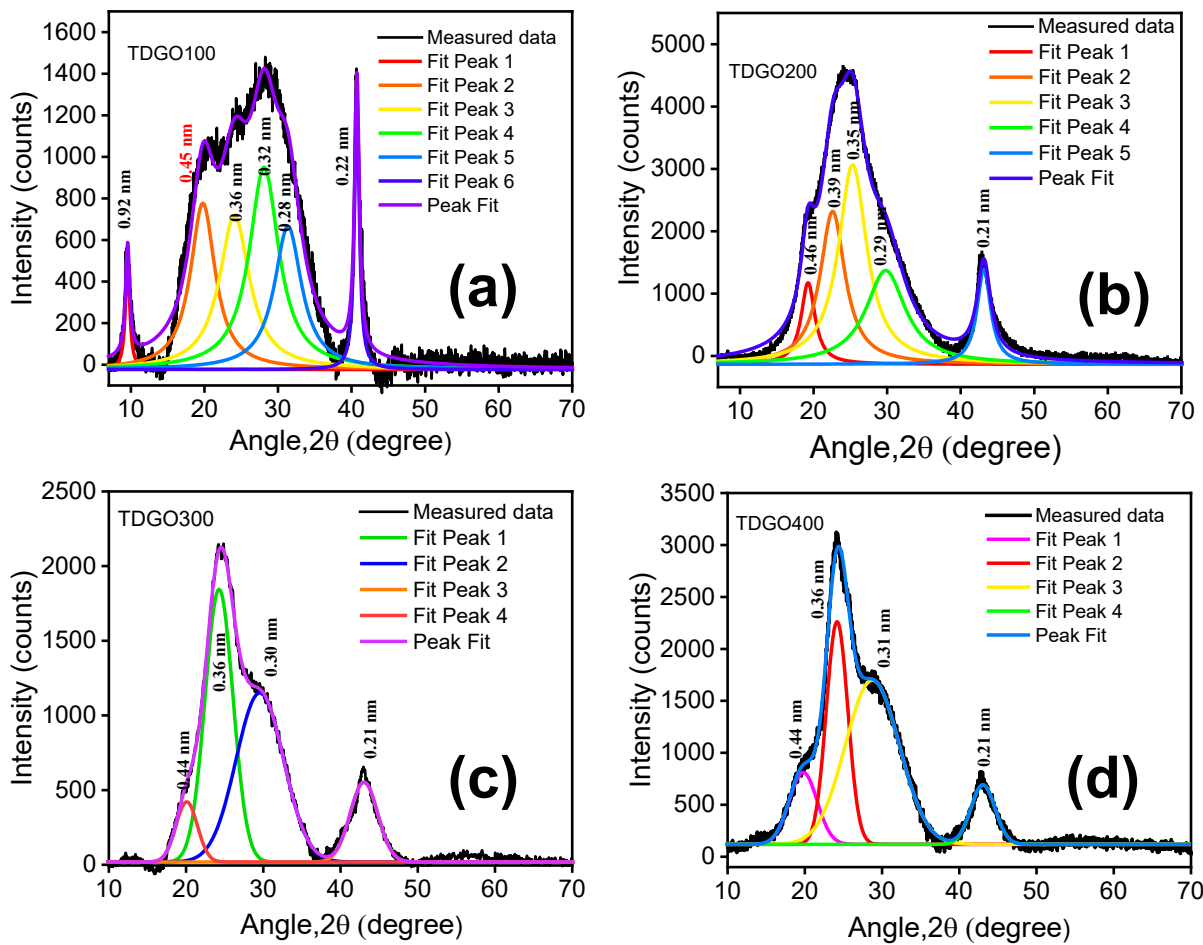

Fig.S3 3The results of (002) peak deconvolution of (a) TDGO 100, (b) TDGO 200, (c) TDGO 300 and (d) TDGO 400 samples.

Table S1 Result of (002) peak deconvolution

| Sample code   | 2 Theta (degree) | Theta (radian) | d value (nm) | FWHM (degree) | D, layer stacking distance (Å) | N <sub>L</sub> , number of layers |
|---------------|------------------|----------------|--------------|---------------|--------------------------------|-----------------------------------|
| Graphite (GR) | 26.3             | 0.23           | 0.34         | 0.37          | 218.13                         | 65                                |
| GO            | 10.9             | 0.09           | 0.81         | 1.54          | 51.58                          | 10                                |
| TDGO100       | 19.78            | 0.17           | 0.37         | 4.08          | 19.77                          | 5                                 |
|               | 24.08            | 0.21           | 0.32         | 4.98          | 16.31                          | 5                                 |
|               | 28.11            | 0.24           | 0.28         | 4.87          | 16.82                          | 6                                 |
|               | 31.35            | 0.27           | 0.22         | 4.49          | 18.38                          | 7                                 |
| TDGO200       | 19.24            | 0.16           | 0.46         | 2.27          | 35.51                          | 9                                 |
|               | 22.58            | 0.20           | 0.39         | 4.09          | 19.81                          | 6                                 |
|               | 25.31            | 0.22           | 0.35         | 4.69          | 17.36                          | 6                                 |
|               | 29.81            | 0.26           | 0.30         | 6.51          | 12.63                          | 5                                 |
| TDGO300       | 20.08            | 0.17           | 0.44         | 2.76          | 22.54                          | 6                                 |
|               | 24.27            | 0.21           | 0.36         | 3.61          | 22.52                          | 7                                 |
|               | 29.55            | 0.25           | 0.30         | 6.15          | 13.36                          | 5                                 |
| TDGO400       | 19.78            | 0.17           | 0.44         | 3.64          | 22.41                          | 6                                 |
|               | 24.17            | 0.21           | 0.36         | 2.75          | 29.13                          | 8                                 |
|               | 28.73            | 0.25           | 0.31         | 7.21          | 11.78                          | 5                                 |

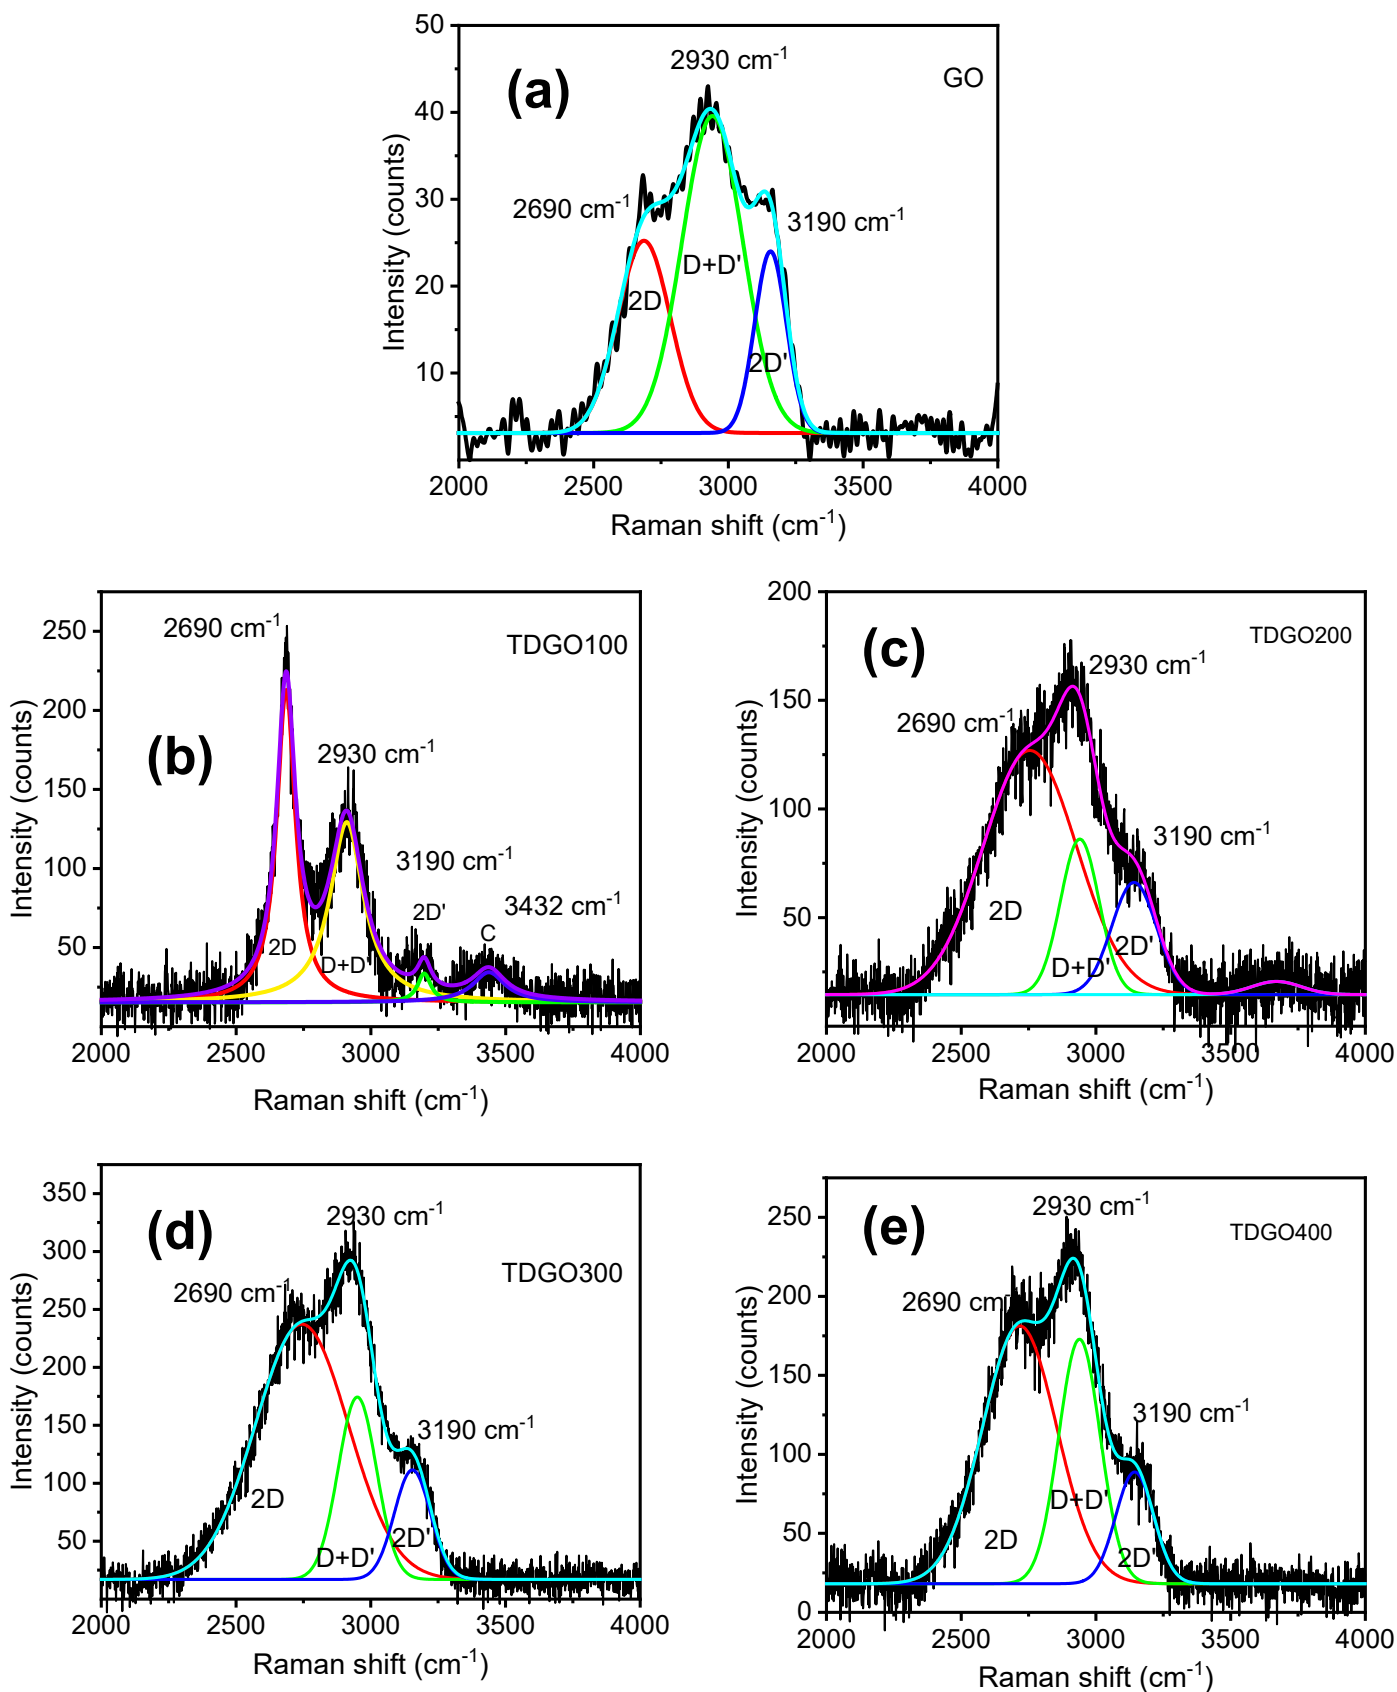

Fig. S4 Deconvolution of second order peak in (a) GO, (b) TDGO100, (c) TDGO200, (d) TDGO300, (e) TDGO400

## Redox reactions during thermal deoxygenation and vacancy defects

During the thermal deoxygenation process, carbon atoms within the GO structure, in an oxidation state of +1 as found in epoxides and alcohols, undergo transformation. They change into two distinct forms: elemental carbon, with an oxidation state of 0, and carbon dioxide (CO<sub>2</sub>), where the oxidation state increases to +4. Furthermore, the elimination of carbon atoms in the form of carbon monoxide (CO) and CO<sub>2</sub> results in vacancy defects. The respective redox equations can be written as follows <sup>2</sup>.

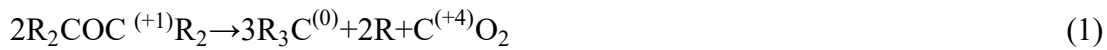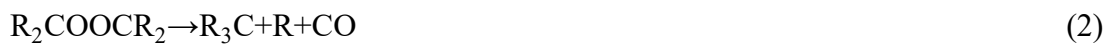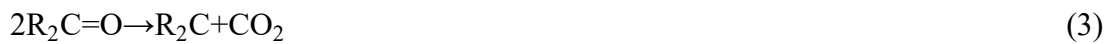

The removal of one carbon atom per every two oxygen atoms from the GO network is observed in the redox equation. In the reaction producing, one carbon atom is removed per every oxygen atom. However, thermally deoxygenated GO (TDGO) with vacancy defects is superior to other RGOs as an electrode material for energy storage in supercapacitors since the holes increase the surface area and provide channels for the transport of ions.

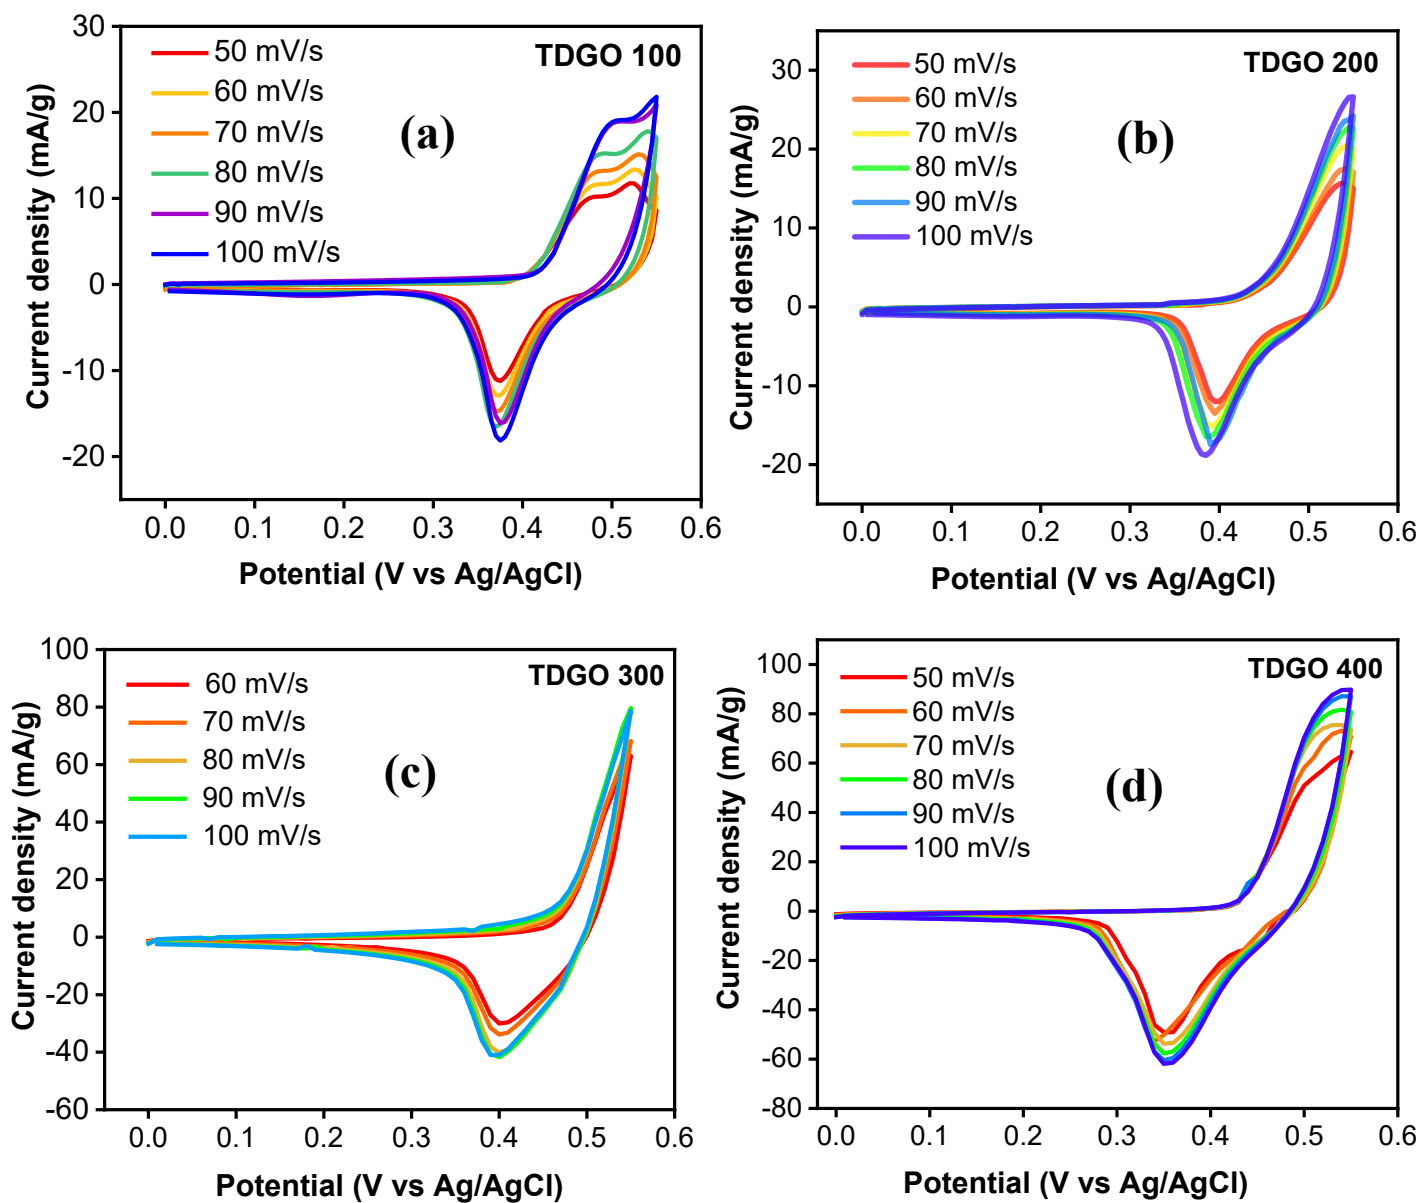

Fig. S5 Cyclic voltammogram of (a) TDGO100, (b) TDGO200, (c) TDGO300 and (d) TDGO400

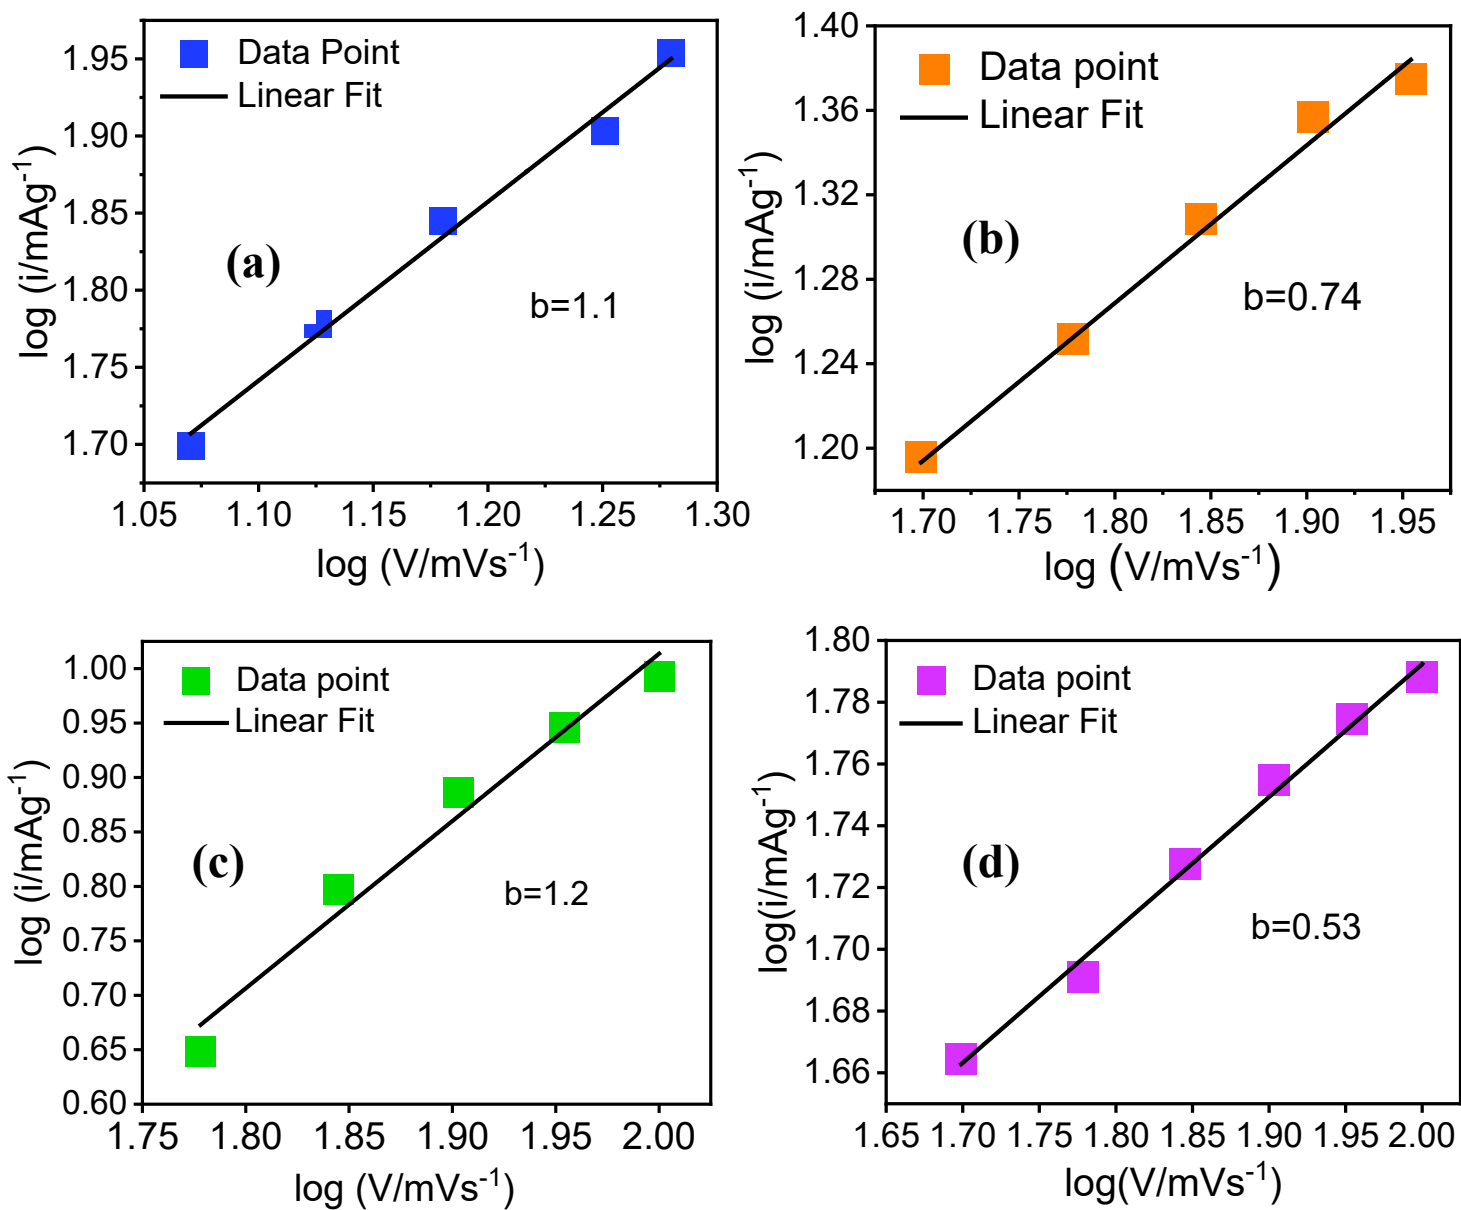

Fig. S6  $\log V$  vs  $\log i$  plot of (a) TDGO100, (b) TDGO200, (c) TDGO300, (d) TDGO400



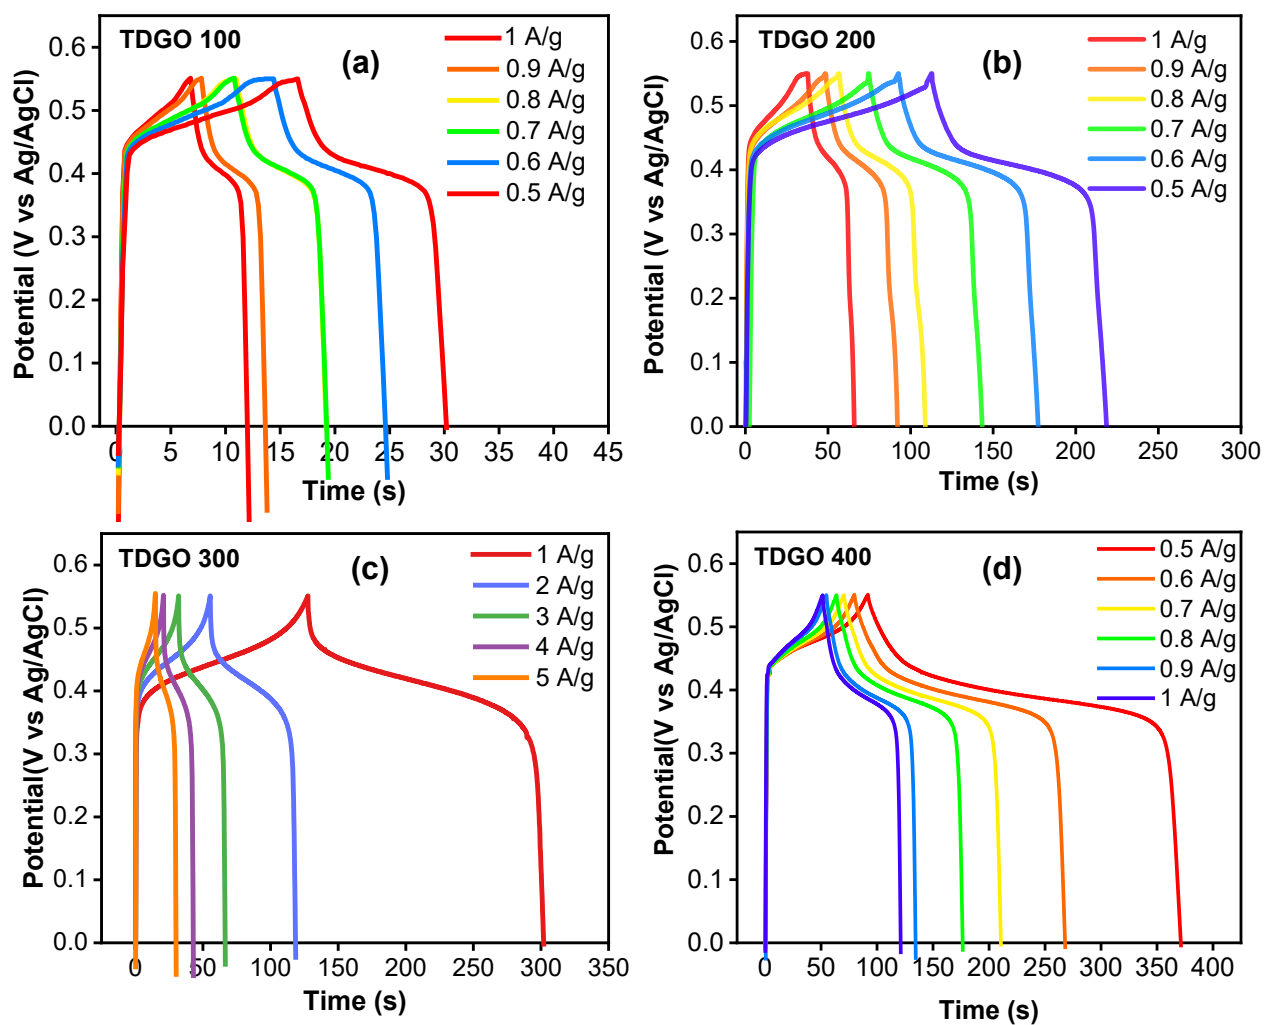

Fig. S7 Galvanostatic charge discharge curves (GCD) of (a) TDGO100, (b) TDGO200, (c) TDGO300, (d) TDGO400 active materials based supercapacitors in three electrode configuration.

Table S2 Energy density power density calculations of TDGO300 in 6 M KOH electrolyte system in three electrode configuration.

| Current density (A/g) | Charging Time (s) | Discharge time (s) | Area under the curve | Areal capacitance (F/cm <sup>2</sup> ) | Energy density (E <sub>d</sub> ) | Power density (P <sub>d</sub> ) | Coulombic Efficiency (CE) |
|-----------------------|-------------------|--------------------|----------------------|----------------------------------------|----------------------------------|---------------------------------|---------------------------|
| 1                     | 127.6             | 174.2              | 22.5505              | 316.7                                  | 13.3                             | 275                             | 136.5                     |
| 2                     | 55.4              | 63                 | 8.6922               | 229.1                                  | 9.62                             | 550                             | 113.7                     |
| 3                     | 32.1              | 34.                | 4.6288               | 185.4                                  | 7.79                             | 825                             | 105.9                     |
| 4                     | 20.8              | 22                 | 3.0324               | 160                                    | 6.72                             | 1100                            | 105.7                     |
| 5                     | 14.8              | 15.2               | 1.9936               | 138.1                                  | 5.81                             | 1375                            | 102.7                     |

## Optimization of redox additive

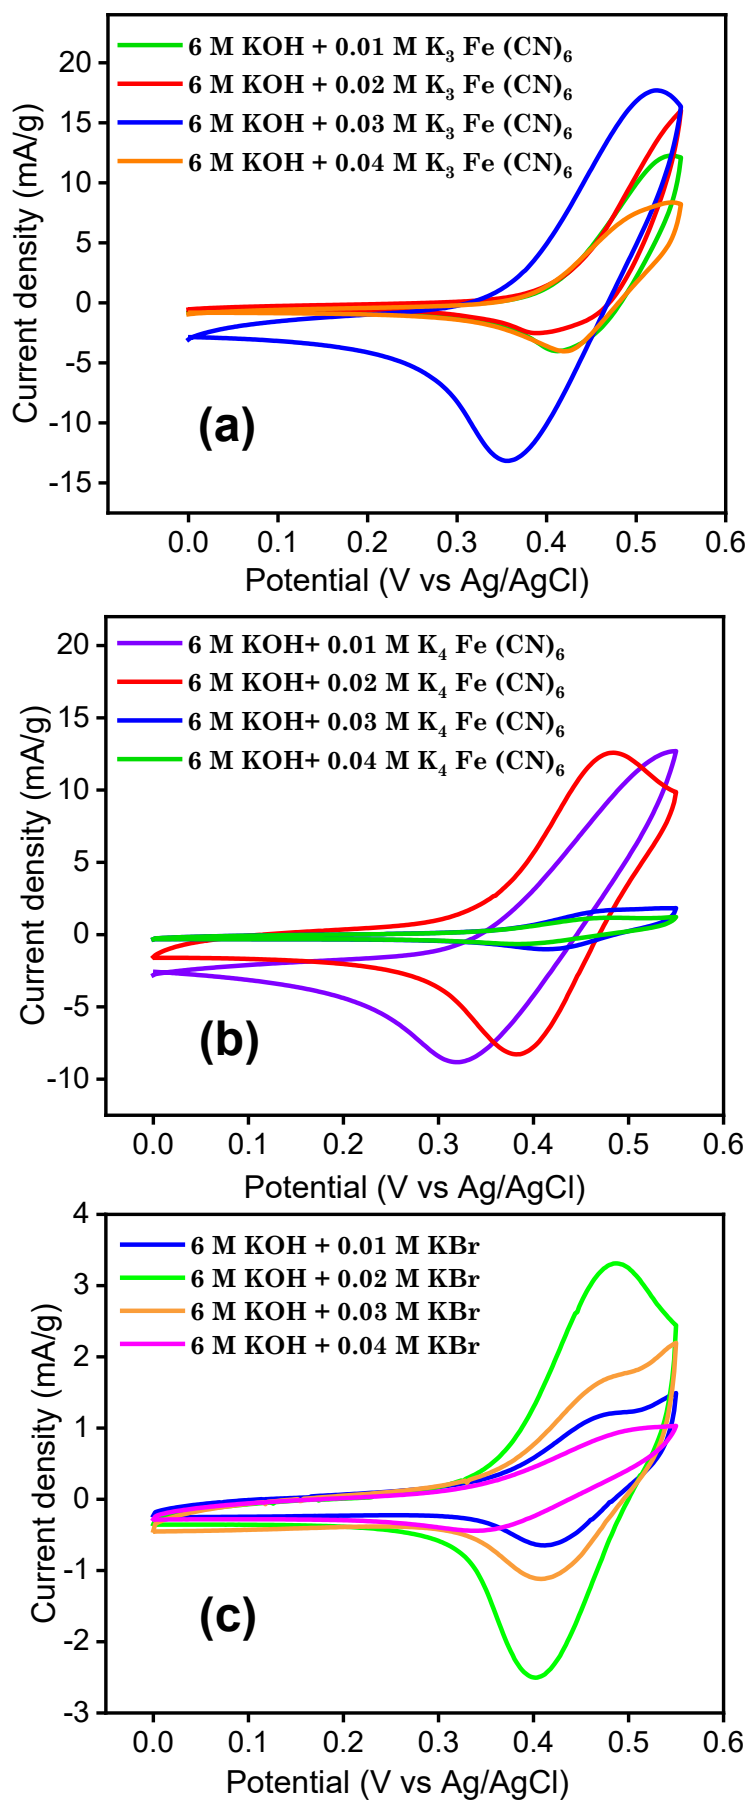

Fig. S8 Cyclic voltammogram of TDGO300 in 6 M KOH with different concentrations of (a)  $\text{K}_3\text{Fe}(\text{CN})_6$ , (b)  $\text{K}_4\text{Fe}(\text{CN})_6$ , (c) KBr

Table S3 Energy density power density calculations of TDGO300 in (KOH/K<sub>3</sub>Fe(CN)<sub>6</sub>) redox additive electrolyte system in three electrode configuration.

| Current density (A/g) | Charging Time (s) | Discharge time (s) | Area under the curve | Areal Specific Capacitance (F/cm <sup>2</sup> ) | Energy density (E <sub>d</sub> ) | Power density (P <sub>d</sub> ) | Coulombic Efficiency (CE) |
|-----------------------|-------------------|--------------------|----------------------|-------------------------------------------------|----------------------------------|---------------------------------|---------------------------|
| 1                     | 688.2             | 653.4              | 98.8943              | 817.3                                           | 34.3                             | 189.2                           | 105.3                     |
| 2                     | 277.6             | 278                | 44.308               | 732.3                                           | 30.7                             | 398.4                           | 99.8                      |
| 3                     | 163.4             | 163.6              | 27.4353              | 680.2                                           | 28.6                             | 628.8                           | 99.8                      |
| 4                     | 106.6             | 106.6              | 18.1942              | 601.4                                           | 25.3                             | 853.4                           | 100                       |
| 5                     | 75.8              | 75.6               | 13.6542              | 564.2                                           | 23.7                             | 1128.8                          | 100.2                     |

Table S4 Energy density power density calculations of TDGO300 in (KOH/K<sub>3</sub>Fe(CN)<sub>6</sub>) redox additive electrolyte system in two electrode configuration.

| Current density (A/g) | Charging Time (s) | Discharge time (s) | Area under the curve | Areal capacitance (F/cm <sup>2</sup> ) | Energy density (E <sub>d</sub> ) | Power density (P <sub>d</sub> ) | Coulombic Efficiency (CE) |
|-----------------------|-------------------|--------------------|----------------------|----------------------------------------|----------------------------------|---------------------------------|---------------------------|
| 1                     | 289.4             | 266                | 49.23                | 414.6                                  | 17.4                             | 235                             | 91.9                      |
| 2                     | 219.4             | 171.8              | 19.67                | 331.4                                  | 13.9                             | 291                             | 78.3                      |
| 3                     | 121.1             | 90.9               | 10.06                | 254.4                                  | 10.6                             | 423                             | 75.1                      |
| 4                     | 23.2              | 19.2               | 5.991                | 168.1                                  | 7.14                             | 1590                            | 105.7                     |
